# Supplementary material
Source: bioRxiv or medRxiv preprint supplement (https://www.biorxiv.org/highwire/filestream/63679/field_highwire_adjunct_files/3/209221-4.pdf)

Figure S4

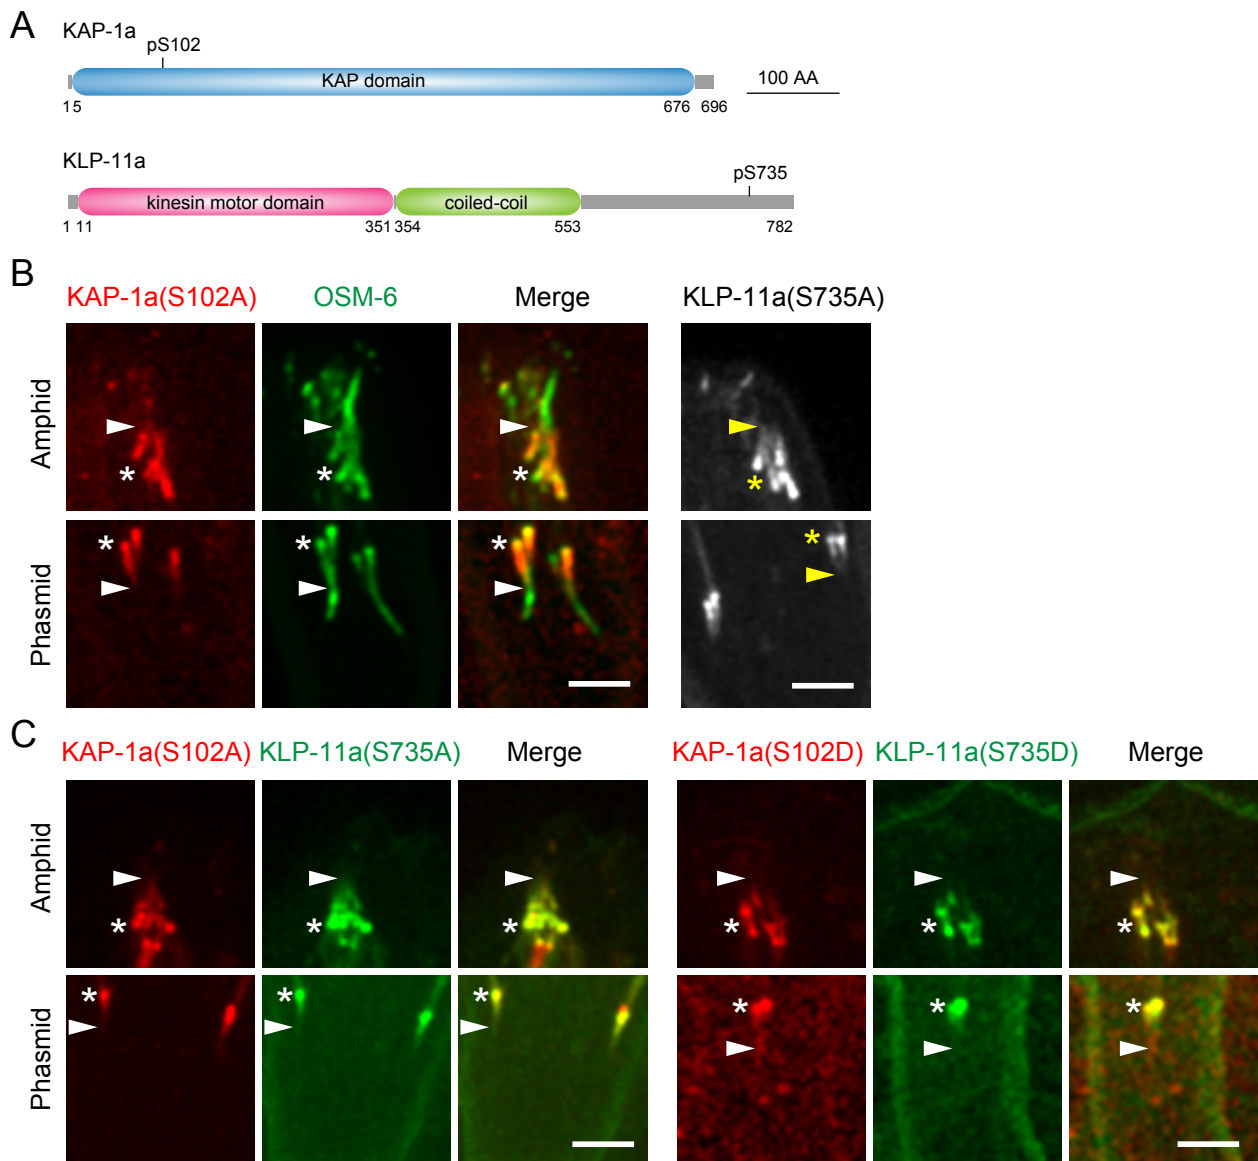

Supplement: Supplementary file [file 209221-4.pdf]
